# Supplementary material for: BMI and the Food Retail Environment in Melbourne, Australia: Associations and Temporal Trends
Source: MDPI journal article supplement (doi:10.3390/nu15214503), 2023-10-24
Supplement: s1 [file s1]

*Supplementary Materials*

# **BMI and the Food Retail Environment in Melbourne, Australia: Associations and Temporal Trends**

Cindy Needham <sup>1,\*</sup>, Claudia Strugnell <sup>1,2</sup>, Steven Allender <sup>1</sup>, Laura Alston <sup>3,4</sup> and Liliana Orellana <sup>5</sup>

**Table S1.** Food outlet descriptions and healthiness scores.

| Food outlet type                    | Description                                                                                                                                                                                                                                                                                                                                           | Health Score |
|-------------------------------------|-------------------------------------------------------------------------------------------------------------------------------------------------------------------------------------------------------------------------------------------------------------------------------------------------------------------------------------------------------|--------------|
| Fruiterer & greengrocer             | Mainly engaged in the sale of fresh fruit and vegetables; including wholesale stores with direct to public sales                                                                                                                                                                                                                                      | 10           |
| Fish shop                           | Mainly engaged in the sale of fresh seafood; including wholesale stores with direct to public sales and takeaway stores also providing a range of fresh seafood.                                                                                                                                                                                      | 9            |
| Poultry shop                        | Mainly engaged in the sale of fresh poultry; including wholesale stores and with direct to public sales.                                                                                                                                                                                                                                              | 9            |
| Butchery                            | Mainly engaged in the sale of fresh meat; including wholesale stores with direct to public sales.                                                                                                                                                                                                                                                     | 9            |
| Major Supermarket                   | Mainly engaged in the sale of groceries (fresh foods, canned and packaged foods, dry goods) of non-specialised (conventional) food lines. May contain a butcher or baker. Usually have 5 or more checkouts and a floor area over 1000 square meters. i.e., Woolworths, Coles, BI-LO, Franklins (no frills), ALDI                                      | 5            |
| Minor Supermarket                   | Mainly engaged in the sale of groceries (fresh foods, canned and packaged food, dry goods) of non-specialised (conventional) food lines. Usually have 4 or fewer checkouts and a floor area under 1000 square meters. E.g. Independent grocer or supermarket.                                                                                         | 5            |
| Specialty food stores – core foods  | Mainly engaged in the sale of a limited line of specialised food such as a particular gourmet food that can be defined under core food.                                                                                                                                                                                                               | 5            |
| Restaurant/café – franchise         | e.g., franchise restaurants and cafes; mainly engaged in the preparation and sale of meals/snacks for consumption on the premises; table service provided; may sell alcohol with food; may provide takeaway services.                                                                                                                                 | 0            |
| Restaurant/café – local independent | e.g., restaurant in a golf club, culture-based restaurant/café which is not a take-away such as Mexican, Thai, Chinese etc. ; mainly engaged in the preparation and sale of meals/snacks for consumption on the premises; table service provided; may also sell alcohol with food, may provide takeaway services.                                     | 0            |
| Sandwich shop                       | Mainly engaged in the preparation of filled bread products like sandwiches or rolls.                                                                                                                                                                                                                                                                  | 5            |
| Salad/sushi bar                     | Mainly engaged in the preparation of salads and sushi.                                                                                                                                                                                                                                                                                                | 5            |
| Delicatessen                        | Mainly engaged in the sale of specialty packaged or fresh products such as cured meats and sausage, pickled vegetables, dips, bread and olives; may also provide dine in meals.                                                                                                                                                                       | 0            |
| Bakery                              | Mainly oriented towards bread, biscuits, pastries or other flour products with or without packaging.                                                                                                                                                                                                                                                  | 0            |
| General store                       | Mainly engaged in the sale of a limited line of groceries generally includes milk, bread and canned and packaged foods.                                                                                                                                                                                                                               | −5           |
| Specialty food store – extra foods  | Mainly engaged in the sale of foods such as ice-creams, donuts, waffles, cakes etc. than can be defined under extra food.                                                                                                                                                                                                                             | −8           |
| Pub                                 | e.g., pub within a bowling park, pub inside a private gambling club; food primarily engaged in selling alcoholic beverages where consumers can order and consume the alcoholic drinks in premises; can also be part of park or private club.                                                                                                          | −5           |
| Take-away local independent         | e.g., kebab, fish & chips, burger, chicken shops, local pizza, mainly engaged in the preparation and sale of meals/snacks that are ready for immediate consumption; table service not provided; meals can be eaten on site; taken away or delivered; shop is not a franchise.                                                                         | −8           |
| Take-away franchise store           | e.g., McDonalds, KFC, Subway; mainly engaged in the preparation and sale of meals (excludes donuts, drinks, ice-cream etc.)/snacks that area ready for immediate consumption; table service not provided; meal can be eaten on site, taken away or delivered; the food shop is a franchise/chain store with food being sold in specialised packaging. | −10          |

Source: Needham et al. 2020 (161); adapted from Moayyed et al. 2017 (68): [https://onlinelibrary.wiley.com/doi/abs/10.1111/1747-0080.12286\\_](https://onlinelibrary.wiley.com/doi/abs/10.1111/1747-0080.12286_)

**Table S2.** Proportion of postal areas within each classification of Food retail environment measures.

|                                       | Year       |            |            |            |
|---------------------------------------|------------|------------|------------|------------|
|                                       | 2008       | 2012       | 2014       | 2016       |
|                                       | N (%)      | N (%)      | N (%)      | N (%)      |
| <b>Supermarket accessibility</b>      |            |            |            |            |
| Low                                   | 190 (72)   | 177 (67.1) | 176 (66.7) | 170 (64.4) |
| Moderate                              | 26 (9.9)   | 32 (12.1)  | 39 (14.8)  | 40 (15.2)  |
| High                                  | 48 (18.2)  | 55 (20.8)  | 49 (18.6)  | 54 (20.5)  |
| <b>Healthy outlet accessibility</b>   |            |            |            |            |
| Low                                   | 154 (58.3) | 149 (56.4) | 128 (48.5) | 144 (54.6) |
| Moderate                              | 40 (15.2)  | 39 (14.8)  | 54 (20.5)  | 44 (16.7)  |
| High                                  | 70 (26.5)  | 76 (28.8)  | 82 (31.1)  | 76 (28.8)  |
| <b>Unhealthy outlet accessibility</b> |            |            |            |            |
| Low                                   | 90 (34.1)  | 84 (31.8)  | 81 (30.7)  | 82 (31.1)  |
| Moderate                              | 50 (18.9)  | 48 (18.2)  | 40 (15.2)  | 39 (14.8)  |
| High                                  | 124 (47)   | 132 (50)   | 143 (54.2) | 143 (54.2) |
| <b>Food Environment Typology</b>      |            |            |            |            |
| Low access – Low % healthy            | 86 (32.58) | 69 (26.1)  | 57 (21.6)  | 67 (25.4)  |
| Low access – Moderate % healthy       | 16 (6.06)  | 22 (8.3)   | 28 (10.6)  | 23 (8.7)   |
| Low access – High % healthy           | 7 (2.65)   | 7 (2.7)    | 10 (3.8)   | 6 (2.3)    |
| Moderate access – Low % healthy       | 25 (9.47)  | 31 (11.7)  | 23 (8.7)   | 24 (9.1)   |
| Moderate access – Moderate % healthy  | 9 (3.41)   | 7 (2.7)    | 12 (4.6)   | 17 (6.4)   |
| Moderate access – High % healthy      | 0 (0.0)    | 0 (0.0)    | 0 (0.0)    | 0 (0.0)    |
| High access – Low % healthy           | 44 (16.67) | 44 (16.7)  | 43 (16.3)  | 47 (17.8)  |
| High access – Moderate % healthy      | 77 (29.17) | 84 (31.8)  | 91 (34.5)  | 80 (30.3)  |
| High access – High % healthy          | 0 (0.0)    | 0 (0.0)    | 0 (0.0)    | 0 (0.0)    |

Healthy, Less Healthy, Unhealthy: Low Access < 1 outlet per km<sup>2</sup>, Moderate Access ≥ 1 outlet per km<sup>2</sup>; High Access ≥ 2 outlet per km<sup>2</sup>. Supermarkets: Low Access = < 0.625 outlet per km<sup>2</sup>, Moderate Access ≥ 0.625 outlets per km<sup>2</sup>; High Access ≥ 1.25 outlet per km<sup>2</sup>. RHFA: represents the percentage (%) of the food environment that is composed of healthy (supermarkets and green grocers) food outlets within each postal area boundary. Total number of Postal Areas within each study years = 264.

**Table S3.** Summary of Food Retail Environment measures of Relative Healthy Food Availability within each Food environment typology by Postal Area in Greater Melbourne between 2008 and 2016.

|                                  | Mean (SD)                              |              |              |              |                                             |             |             |             |                                         |              |             |              |
|----------------------------------|----------------------------------------|--------------|--------------|--------------|---------------------------------------------|-------------|-------------|-------------|-----------------------------------------|--------------|-------------|--------------|
|                                  | 2008                                   | 2012         | 2014         | 2016         | 2008                                        | 2012        | 2014        | 2016        | 2008                                    | 2012         | 2014        | 2016         |
|                                  | <b>Low access - Low % healthy</b>      |              |              |              | <b>Moderate access - Low % healthy</b>      |             |             |             | <b>High access - Low % healthy</b>      |              |             |              |
| Supermarkets per km <sup>2</sup> | 0.07(0.1)                              | 0.08(0.11)   | 0.08(0.13)   | 0.07(0.11)   | 0.15(0.13)                                  | 0.27(0.19)  | 0.26(0.2)   | 0.34(0.21)  | 0.44(0.45)                              | 0.69(0.59)   |             |              |
| Healthy per km <sup>2</sup>      | 0.18(0.22)                             | 0.17(0.22)   | 0.21(0.27)   | 0.14(0.20)   | 0.54(0.35)                                  | 0.59(0.36)  | 0.72(0.37)  | 0.68(0.31)  | 1.58(1.38)                              | 1.74(1.31)   | 2.16(2.13)  | 1.87(1.66)   |
| Less Healthy per km <sup>2</sup> | 0.64(1.69)                             | 0.58(1.8)    | 0.38(0.34)   | 0.41(0.47)   | 1.73(1.36)                                  | 1.75(1.20)  | 2.33(3.43)  | 1.53(0.56)  | 10.65(15.81)                            | 11.12(15.07) | 11.8(17.02) | 12.08(16.68) |
| Unhealthy per km <sup>2</sup>    | 0.63(0.63)                             | 0.56(0.53)   | 0.61(0.63)   | 0.65(1.12)   | 1.8(0.55)                                   | 1.76(0.70)  | 1.88(0.80)  | 2.19(0.67)  | 5.25(4.98)                              | 5.82(5.35)   | 6.23(6.40)  | 6.44(6.25)   |
| RHFA (% healthy)                 | 10.05(9.45)                            | 10.89(10.52) | 9.19(11.23)  | 8.49(9.9)    | 14.84(9.36)                                 | 18.62(9.21) | 17.9(10.57) | 17.27(7.53) | 16.72(7.06)                             | 18.51(6.49)  | 17.75(5.76) | 17.86(5.80)  |
|                                  | <b>Low access - Moderate % healthy</b> |              |              |              | <b>Moderate access - Moderate % healthy</b> |             |             |             | <b>High access - Moderate % healthy</b> |              |             |              |
| Supermarkets per km <sup>2</sup> | 0.12(0.15)                             | 0.15(0.16)   | 0.13(0.10)   | 0.15(0.10)   | 0.34(0.18)                                  | 0.36(0.22)  | 0.4(0.17)   | 0.48(0.25)  | 0.82(0.38)                              | 1.03(0.65)   | 0.97(0.57)  | 1.09(0.66)   |
| Healthy per km <sup>2</sup>      | 0.24(0.21)                             | 0.29(0.24)   | 0.3(0.23)    | 0.27(0.17)   | 1.14(0.18)                                  | 0.87(0.28)  | 0.95(0.33)  | 0.95(0.36)  | 2.6(1.41)                               | 2.61(1.95)   | 2.83(1.67)  | 2.8(1.57)    |
| Less Healthy per km <sup>2</sup> | 0.5(0.41)                              | 0.57(0.48)   | 0.47(0.38)   | 0.52(0.41)   | 1.59(0.26)                                  | 1.53(0.44)  | 1.8(1.03)   | 2.29(3.50)  | 7.03(5.74)                              | 7.06(7.37)   | 6.92(6.24)  | 7.64(7.18)   |
| Unhealthy per km <sup>2</sup>    | 0.35(0.28)                             | 0.43(0.34)   | 0.49(0.34)   | 0.48(0.31)   | 1.54(0.32)                                  | 1.42(0.30)  | 1.44(0.51)  | 1.6(0.65)   | 3.66(2.29)                              | 4.01(2.97)   | 4.1(2.41)   | 4.26(2.65)   |
| RHFA (% healthy)                 | 39.31(9.21)                            | 36.31(7.75)  | 34.38(6.46)  | 34.48(7.58)  | 36.35(9.58)                                 | 31.77(6.58) | 36.06(8.24) | 34.25(7.58) | 35.09(7.00)                             | 34.02(6.39)  | 34.21(7.20) | 34.17(7.79)  |
|                                  | <b>Low access - High % healthy</b>     |              |              |              |                                             |             |             |             |                                         |              |             |              |
| Supermarkets per km <sup>2</sup> | 0.13(0.17)                             | 0.08(0.09)   | 0.05(0.06)   | 0.07(0.09)   |                                             |             |             |             |                                         |              |             |              |
| Healthy per km <sup>2</sup>      | 0.19(0.25)                             | 0.11(0.1)    | 0.06(0.06)   | 0.09(0.09)   |                                             |             |             |             |                                         |              |             |              |
| Less Healthy per km <sup>2</sup> | 0.53(1.05)                             | 0.25(0.26)   | 0.1(0.20)    | 0.22(0.45)   |                                             |             |             |             |                                         |              |             |              |
| Unhealthy per km <sup>2</sup>    | 0.06(0.11)                             | 0.05(0.10)   | 0.02(0.02)   | 0.02(0.02)   |                                             |             |             |             |                                         |              |             |              |
| RHFA (% healthy)                 | 85.71(17.82)                           | 84.35(19.77) | 82.55(18.97) | 83.33(18.26) |                                             |             |             |             |                                         |              |             |              |

Healthy, Less Healthy, Unhealthy: Low Access < 1 outlet per km<sup>2</sup>, Moderate Access ≥ 1 outlet per km<sup>2</sup>; High Access ≥ 2 outlet per km<sup>2</sup>. Supermarkets: Low Access = < 0.625 outlet per km<sup>2</sup>, Moderate Access ≥ 0.625 outlets per km<sup>2</sup>; High Access ≥ 1.25 outlet per km<sup>2</sup>. RHFA: represents the percentage (%) of the food environment that is composed of healthy (supermarkets and green grocers) food outlets within each postal area boundary. Total number of Postal Areas within each study years = 264.

**Table S4.** Proportion of the Melbourne population sample within each food retail environment measure defined at the postcode level.

|                                           | Year         |              |              |              |
|-------------------------------------------|--------------|--------------|--------------|--------------|
|                                           | 2008         | 2012         | 2014         | 2016         |
|                                           | (N = 12,526) | (N = 11,246) | (N = 11,760) | (N = 11,713) |
|                                           | (%)          | (%)          | (%)          | (%)          |
| <b>Relative Healthy Food Availability</b> |              |              |              |              |
| zero                                      | 3.1          | 3.6          | 2.2          | 2.2          |
| ≤ 25%                                     | 64.2         | 57.9         | 44.1         | 55.3         |
| > 25 & ≤ 50%                              | 31.0         | 37.3         | 52.0         | 40.9         |
| > 50%                                     | 1.7          | 1.3          | 1.8          | 1.6          |
| <b>Supermarket accessibility</b>          |              |              |              |              |
| Low                                       | 78.1         | 71.3         | 71.1         | 66.9         |
| Moderate                                  | 13.1         | 16.2         | 17.6         | 18.8         |
| High                                      | 8.8          | 12.6         | 11.3         | 14.3         |
| <b>Healthy outlet accessibility</b>       |              |              |              |              |
| Low                                       | 60.2         | 56.9         | 48.0         | 54.3         |
| Moderate                                  | 20.2         | 20.1         | 25.4         | 21.0         |
| High                                      | 19.6         | 23.0         | 26.6         | 24.8         |
| <b>Less Healthy outlet accessibility</b>  |              |              |              |              |
| Low                                       | 35.2         | 29.5         | 30.4         | 27.6         |
| Moderate                                  | 18.5         | 19.5         | 18.2         | 20.5         |
| High                                      | 46.4         | 51.0         | 51.4         | 51.9         |
| <b>Unhealthy outlet accessibility</b>     |              |              |              |              |
| Low                                       | 28.3         | 26.3         | 24.6         | 24.4         |
| Moderate                                  | 24.7         | 21.2         | 17.9         | 17.0         |
| High                                      | 47.1         | 52.5         | 57.5         | 58.6         |
| <b>Food Environment Typology</b>          |              |              |              |              |
| Low access - High % healthy               | 1.1          | 0.9          | 1.7          | 1            |
| Low access - Moderate % Healthy           | 3.3          | 9            | 14.4         | 8.9          |
| Low access - Low % healthy                | 33.1         | 22.7         | 15.4         | 20.8         |
| Moderate access - Moderate % healthy      | 4.9          | 3.2          | 5.2          | 7            |
| Moderate access - Low % healthy           | 12.3         | 15.5         | 9.9          | 11.7         |

|                                  |      |      |      |      |
|----------------------------------|------|------|------|------|
| High access - Moderate % healthy | 24.3 | 25.4 | 31.3 | 26.2 |
| High access - Low % healthy      | 21   | 23.4 | 22.2 | 24.5 |

Healthy, Less Healthy, Unhealthy: Low Access < 1 outlet per km<sup>2</sup>, Moderate Access ≥ 1 outlet per km<sup>2</sup>; High Access ≥ 2 outlet per km<sup>2</sup>. Supermarkets: Low Access = < 0.625 outlet per km<sup>2</sup>, Moderate Access ≥ 0.625 outlets per km<sup>2</sup>; High Access ≥ 1.25 outlet per km<sup>2</sup>. Relative Healthy Food Availability: represents the proportion (%) of the food environment that is composed of healthy (supermarkets and green grocers) food outlets within each postal area boundary.

**Table S5.** Sidak adjusted pairwise comparisons of the mean BMI between years and between levels of Healthy food outlet accessibility defined at the postcode level in Greater Melbourne, Australia.

|                                                | Healthy | Healthy                    | Supermarkets               | Unhealthy                  |
|------------------------------------------------|---------|----------------------------|----------------------------|----------------------------|
| <i>Between food environment measure levels</i> |         |                            | Contrast (95%CI)           |                            |
| <i>High vs Low</i>                             |         | <b>−0.68(−0.94, −0.43)</b> | <b>−0.32(−0.56, −0.07)</b> | 0.16(−0.11, 0.44)          |
| <i>Moderate vs Low</i>                         |         | <b>−0.34(−0.57, −0.12)</b> | <b>−0.33(−0.63, −0.04)</b> | <b>−0.38(−0.64, −0.12)</b> |
| <i>High vs Moderate</i>                        |         | <b>−0.34(−0.6, −0.08)</b>  | −0.02(−0.33, 0.29)         | <b>−0.54(−0.78, −0.3)</b>  |
| <i>Between levels year</i>                     |         |                            |                            |                            |
| <i>2012 vs 2008</i>                            |         | <b>0.37(0.18, 0.57)</b>    | <b>0.35(0.1, 0.6)</b>      | <b>0.44(0.26, 0.63)</b>    |
| <i>2014 vs 2008</i>                            |         | <b>0.37(0.18, 0.57)</b>    | <b>0.31(0.06, 0.57)</b>    | <b>0.46(0.27, 0.66)</b>    |
| <i>2016 vs 2008</i>                            |         | <b>0.56(0.36, 0.76)</b>    | <b>0.52(0.27, 0.77)</b>    | <b>0.71(0.51, 0.9)</b>     |
| <i>2014 vs 2012</i>                            |         | 0(−0.2, 0.19)              | −0.04(−0.28, 0.2)          | 0.02(−0.18, 0.22)          |
| <i>2016 vs 2012</i>                            |         | 0.19(−0.01, 0.39)          | 0.17(−0.06, 0.4)           | <b>0.26(0.06, 0.47)</b>    |
| <i>2016 vs 2014</i>                            |         | 0.19(0, 0.38)              | 0.21(−0.03, 0.44)          | <b>0.25(0.04, 0.45)</b>    |

Model: BMI Mean estimates and 95% confidence intervals obtained under linear mixed models including postal area as a random effect; and the Food environment measure (Healthy, Unhealthy food outlets, Supermarkets) interaction x year, adjusted by Age, Gender, Education, Employment Status, Household Income and Length of time lived in local area.

Pairwise comparisons presented only for measures for which the interaction measure x year was not significant. Bold:  $p \leq 0.05$ .

Measure of accessibility for Healthy: Low Access < 1 outlet per km<sup>2</sup>, Moderate Access  $\geq 1$  outlet per km<sup>2</sup>; High Access  $\geq 2$  outlet per km<sup>2</sup>.

**Table S6.** Sidak adjusted pairwise comparisons of the mean BMI between levels of food environment typology defined at the postcode level in Greater Melbourne, Australia.

| Food Environment Typology                                                | Contrast [95% CI]          |
|--------------------------------------------------------------------------|----------------------------|
| Low access - Low % healthy vs Low access - High % healthy                | 0.18(−0.65, 1.02)          |
| Low access - Moderate % healthy vs Low access - High % healthy           | 0.08(−0.78, 0.95)          |
| Low access - Moderate % healthy vs Low access - Low % healthy            | −0.10(−0.49, 0.29)         |
| Low access - Moderate % healthy vs Moderate access - Low % healthy       | 0.06(−0.42, 0.55)          |
| Low access - Moderate % healthy vs Moderate access - Moderate % healthy  | 0.33(−0.23, 0.90)          |
| Low access - Moderate % healthy vs High access - Low % healthy           | <b>0.73(0.27, 1.20)</b>    |
| Low access - Moderate % healthy vs High access - Moderate % healthy      | <b>0.63(0.19, 1.08)</b>    |
| Moderate access - Low % healthy vs Low access - High % healthy           | 0.02(−0.84, 0.88)          |
| Moderate access - Low % healthy vs Low access - Low % healthy            | −0.16(−0.55, 0.22)         |
| Moderate access - Moderate % healthy vs Low access - High % healthy      | −0.25(−1.16, 0.66)         |
| Moderate access - Moderate % healthy vs Moderate access - Low % healthy  | −0.27(−0.77, 0.23)         |
| Moderate access - Moderate % healthy vs High access - Low % healthy      | 0.40(−0.08, 0.89)          |
| Moderate access - Moderate % healthy vs High access - Moderate % healthy | 0.30(−0.17, 0.77)          |
| Moderate access - Moderate % healthy vs Low access - Low % healthy       | −0.43(−0.93, 0.06)         |
| High access - Low % healthy Vs Low access - High % healthy               | −0.65(−1.49, 0.18)         |
| High access - Low % healthy vs Low access - Low % healthy                | <b>−0.84(−1.20, −0.47)</b> |
| High access - Low % healthy vs Moderate access - Low % healthy           | <b>−0.67(−1.05, −0.29)</b> |
| High access - Moderate % healthy vs Low access - High % healthy          | −0.55(−1.37, 0.28)         |
| High access - Moderate % healthy vs Low access - Low % healthy           | <b>−0.73(−1.08, −0.39)</b> |
| High access - Moderate % healthy vs Moderate access - Low % healthy      | <b>−0.57(−0.94, −0.20)</b> |
| High access - Moderate % healthy vs High access - Low % healthy          | 0.10(−0.18, 0.39)          |

Model: BMI Mean estimates and 95% confidence intervals obtained under linear mixed models including postal area as a random effect; and the Food environment measure (Healthy, Unhealthy food outlets, Supermarkets) interaction x year, adjusted by Age, Gender, Education, Employment Status, Household Income and Length of time lived in local area.

Bold:  $p \leq 0.01$ .

Food environment typology reflects postcodes grouped by similarities across Relative Healthy Food Access; and, Food Retail Accessibility Measures related to Supermarkets, Healthy, Less Healthy and Unhealthy food outlets per km<sup>2</sup>.
